# Supplementary material
Source: Springer Nature journal article supplement (https://www.springermedizin.de/resource/supplementary/13058_2012_3202_MOESM10_ESM.pdf/9703502)

% Change ~90 days of chemotherapy

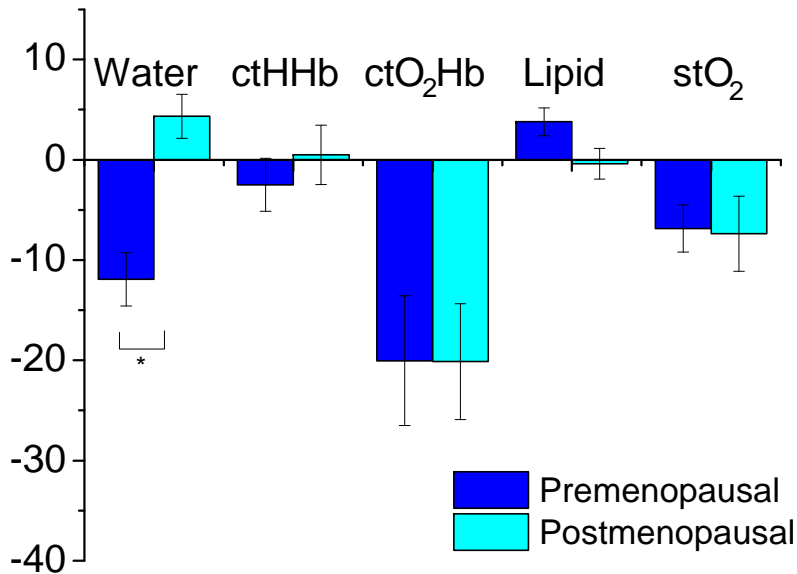

Supplement: MOESM10 [file 9703502]
